# Supplementary material
Source: PubMed Central journal article supplement (PMC6542629)

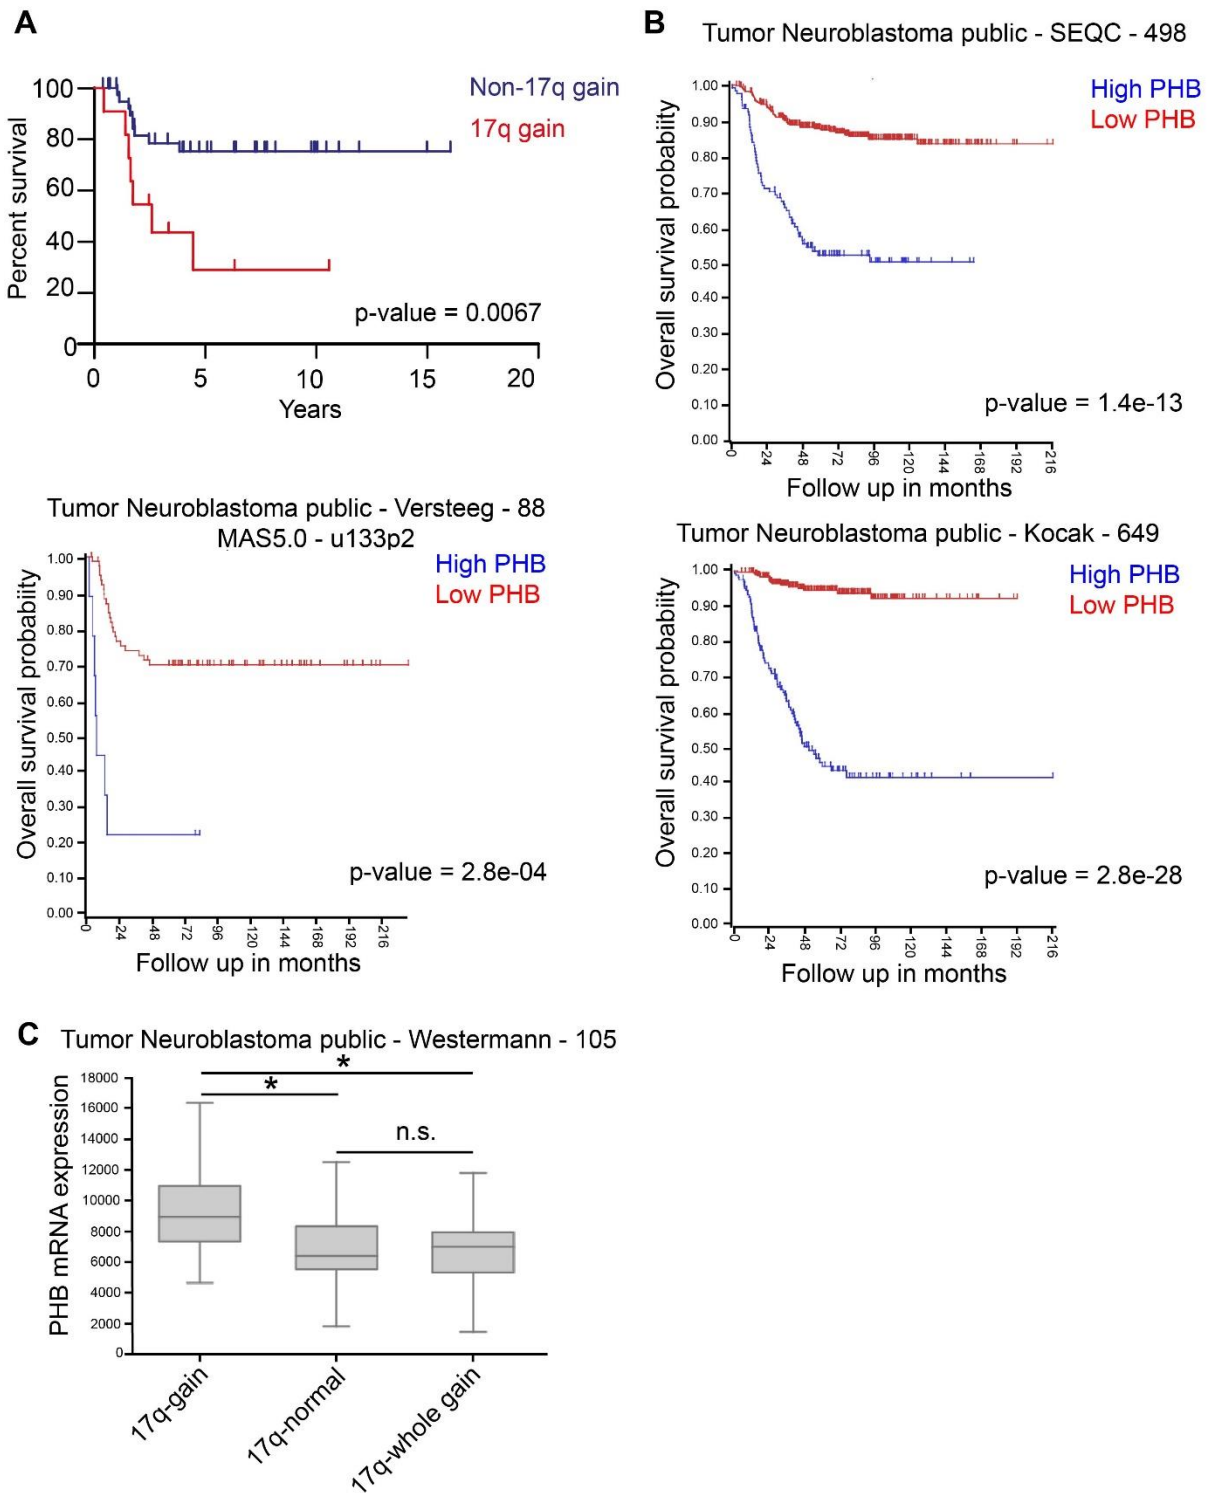

1

2

3 **Supplemental Figure 1. 17q gain and prohibitin expression correlates with poor**  
 4 **prognosis in neuroblastoma. A.** Kaplan-Meier curve displaying overall survival of patients  
 5 with 17q gain vs. whole 17 or no gain. p-value calculated by log-rank test.

6 **B.** Kaplan-Meier curves of overall neuroblastoma survival probability generated from publicly-  
 7 available neuroblastoma data sets accessible at the R2 Genomics Analysis and Visualization  
 8 Platform. Survival cutoffs determined by KaplanScan. p-values calculated by log-rank test. **C.**  
 9 *PHB* expression in patients with 17q gain, whole 17 gain, or no gain. \*p < 0.001, one-way  
 10 analysis of variance.

11  
12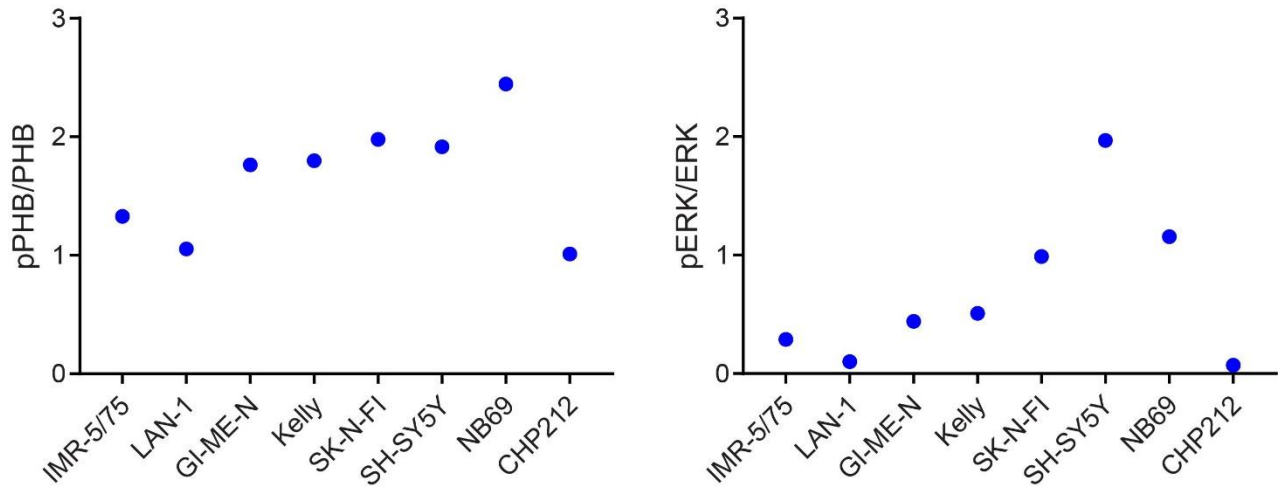

13  
14 **Supplemental Figure 2. Prohibitin and ERK are phosphorylated in neuroblastoma cell**  
15 **lines.** Quantification of western blot displayed in Figure 2C showing ratios of phosphorylated  
16 to unphosphorylated PHB and ERK1/2.

17  
18  
19  
20  
21  
22  
23  
24  
25  
26  
27  
28  
29  
30  
31  
32  
33  
34  
35  
36  
37  
38  
39  
40  
41  
42  
43  
44

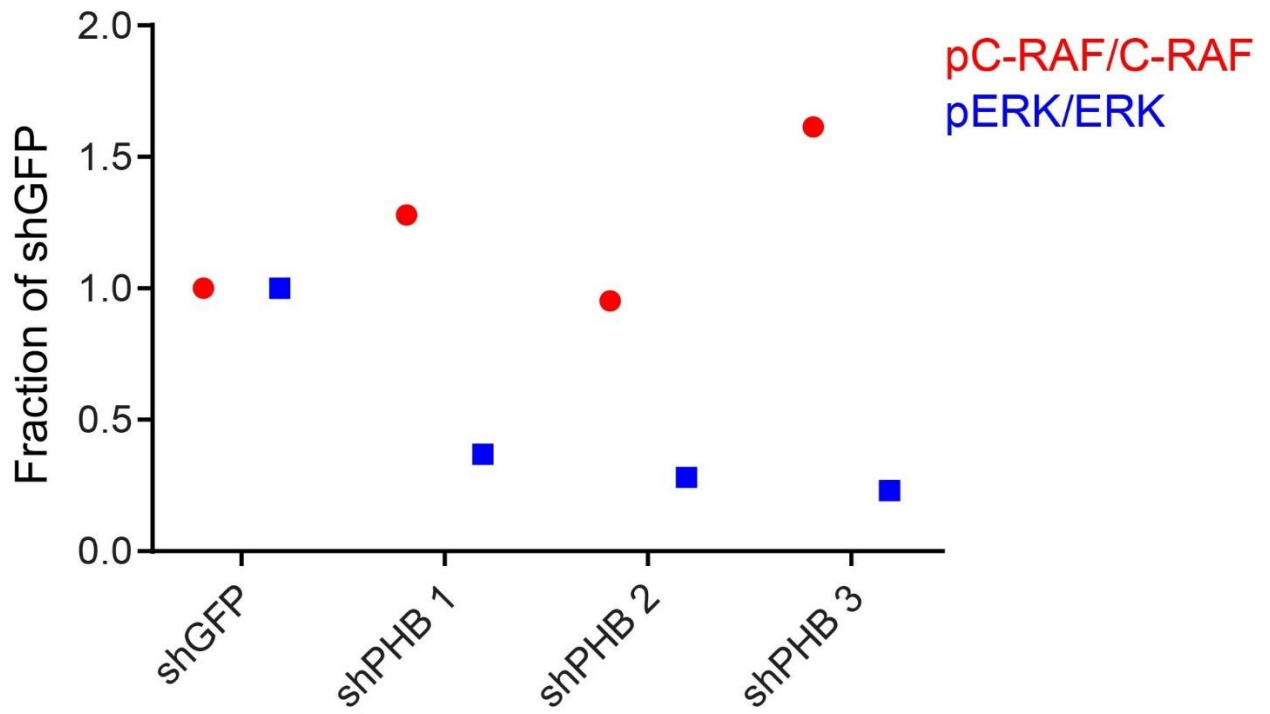

45  
46 **Supplemental Figure 3. PHB knockdown impairs ERK activation.** Quantification of western  
47 blot displayed in Figure 3A showing ratios of phosphorylated to total c-RAF and ERK1/2.  
48  
49  
50  
51  
52  
53  
54  
55  
56  
57  
58  
59  
60  
61  
62  
63  
64  
65  
66  
67  
68  
69  
70  
71

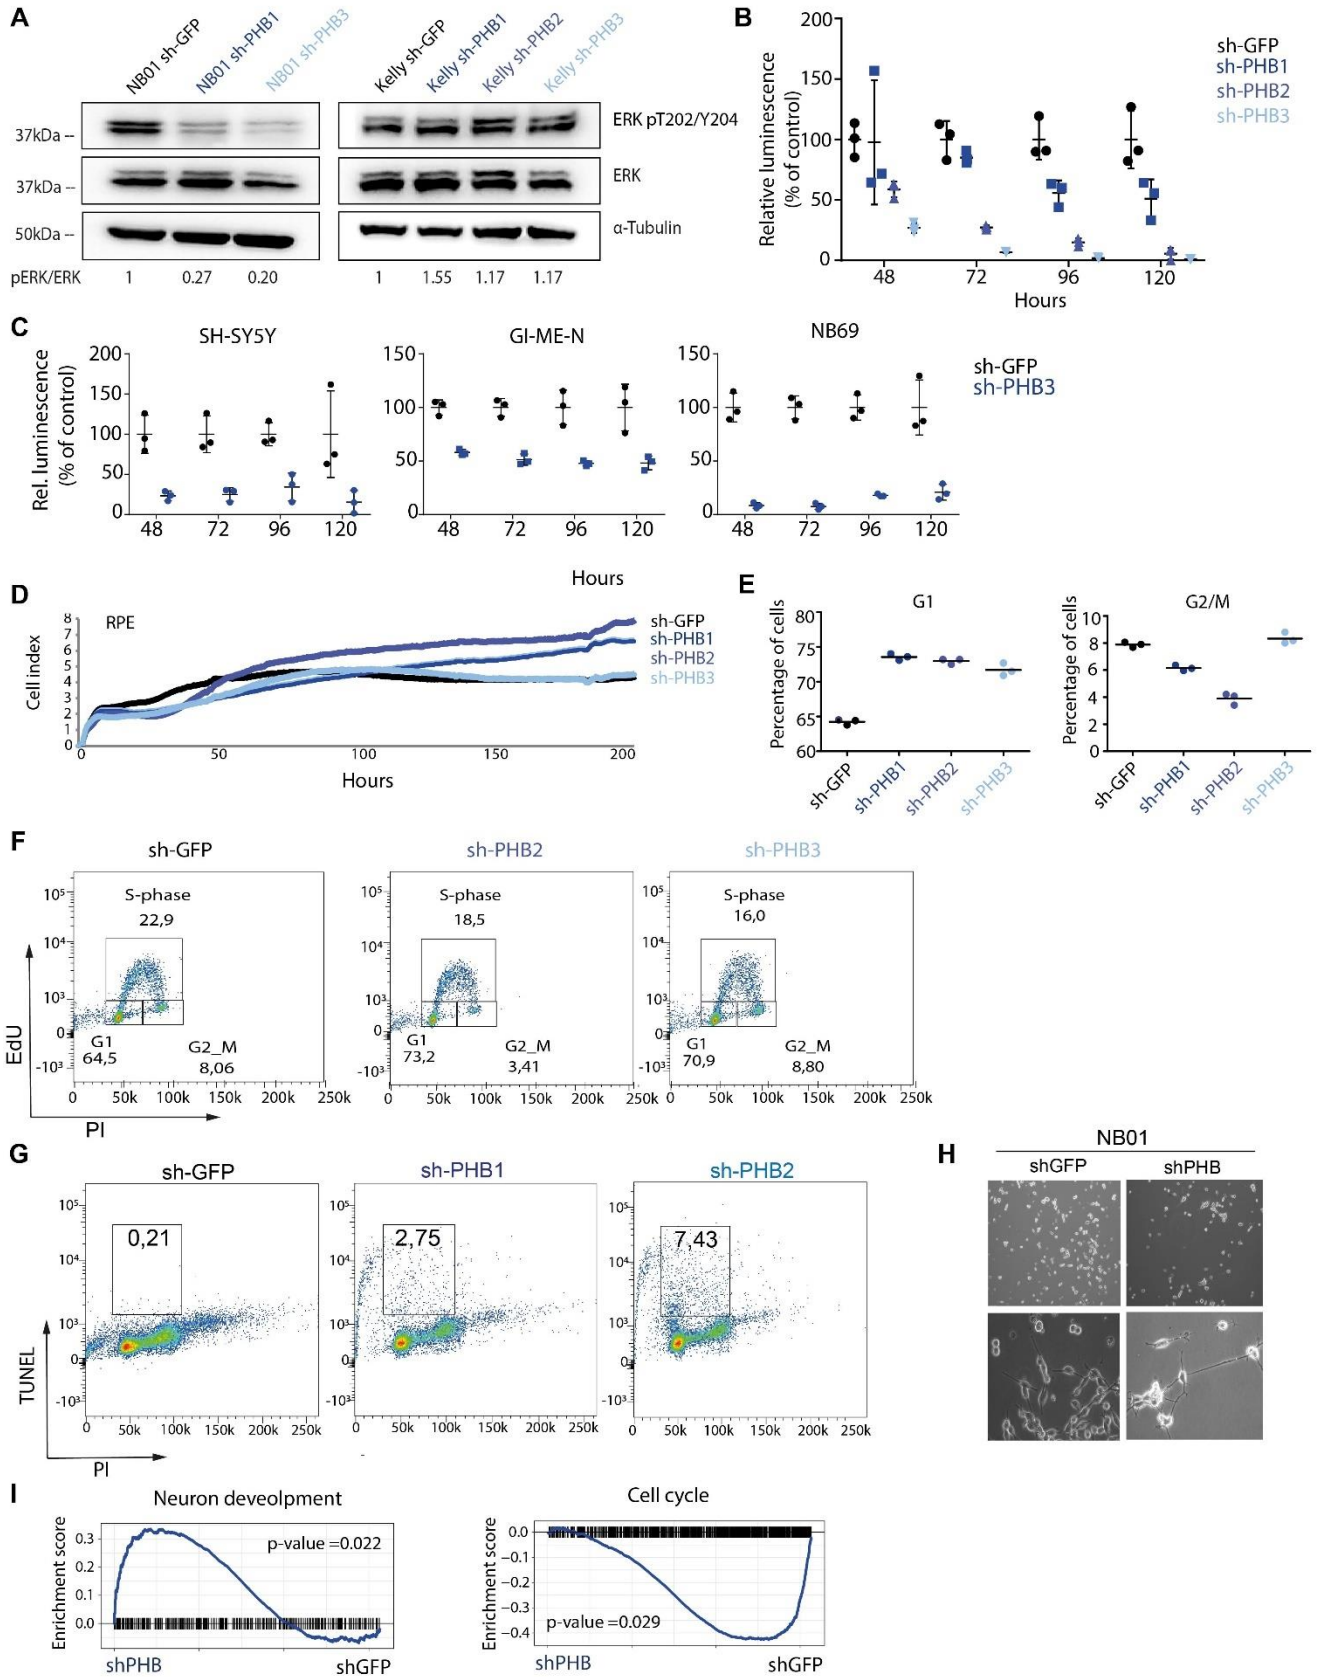

72  
73  
74  
75  
76  
77



78 **Supplemental Figure 4. *PHB* knockdown impairs ERK activation, reduces cell viability,**  
79 **slows cell cycle progression, induces apoptosis, and promotes differentiation of**  
80 **neuroblastoma cells. A.** Western blot analysis of NB01 and Kelly cells after *PHB* knockdown.  
81 Data represent a single experiment. **B.** Relative viability of IMR-5/75 cells after knockdown of  
82 *PHB* using three independent hairpins as measured with the CellTiter-Glo luminescent viability  
83 assay over the course of 120 hours. Data represent mean +/- SEM. Three technical replicates  
84 shown. **C.** Relative viability of SH-SY5Y, GI-ME-N, and NB69 cells after knockdown of *PHB*  
85 using one hairpin as measured with the CellTiter-Glo luminescent viability assay over the  
86 course of 120 hours. Data represent mean +/- SEM. Three technical replicates shown. **D.**  
87 Proliferation of RPE cells stably expressing shRNAs targeting *PHB* compared to cells  
88 expressing an shRNA targeting *GFP* as measured with the RTCA iCelligence system. **E.**  
89 Quantification of IMR-5/75 cells in G2/M phase (left) and G1 phase (right) after *PHB*  
90 knockdown. **F.** FACS plots showing cell cycle distribution of IMR-5/75 cells after *PHB*  
91 knockdown with two independent hairpins. Three technical replicates shown. **G.**  
92 Representative FACS plots of TUNEL-stained IMR-5/75 neuroblastoma cells after *PHB*  
93 knockdown. Three technical replicates shown. **H.** Photomicrographs of NB01 cells after  
94 transduction with shRNAs against either *PHB* or *GFP*. Photomicrographs representative of  
95 three independent samples. **I.** GSEA plots of neuron development and cell cycle-related genes  
96 after *PHB* knockdown. n = 3, Fisher's exact test. Stated n-values indicate number of biological  
97 replicates.

98

99

100

101

102

103

104

105

106

107

108

109

110

111

112

113

114

115

116

117

118

119

120

121

122

123

124

125

126

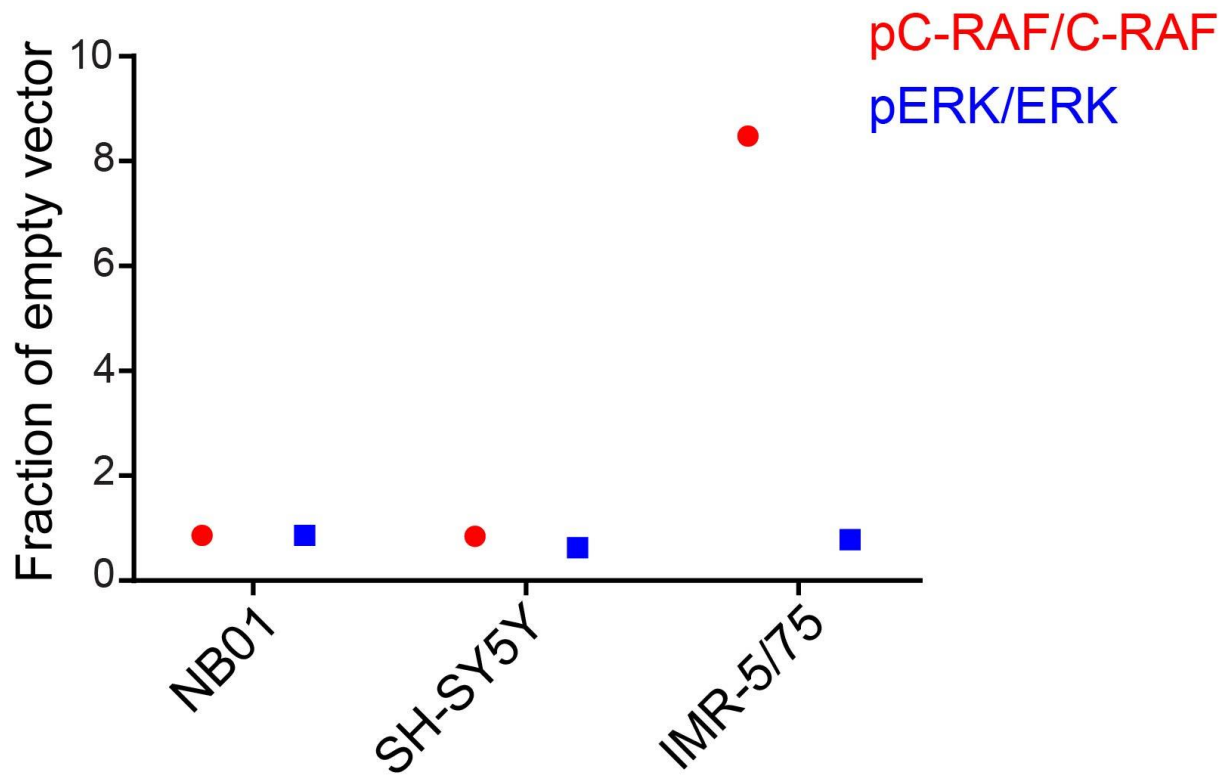

127

128 **Supplemental Figure 5. Expression of *PHB-V5* is not sufficient to increase**129 **phosphorylation of c-RAF or ERK1/2.** Quantification of western blot displayed in Figure 5A

130 showing ratios of phosphorylated to total c-RAF and ERK1/2.

131

132

133

134

135

136

137

138

139

140

141

142

143

144

145

146

147

148

149

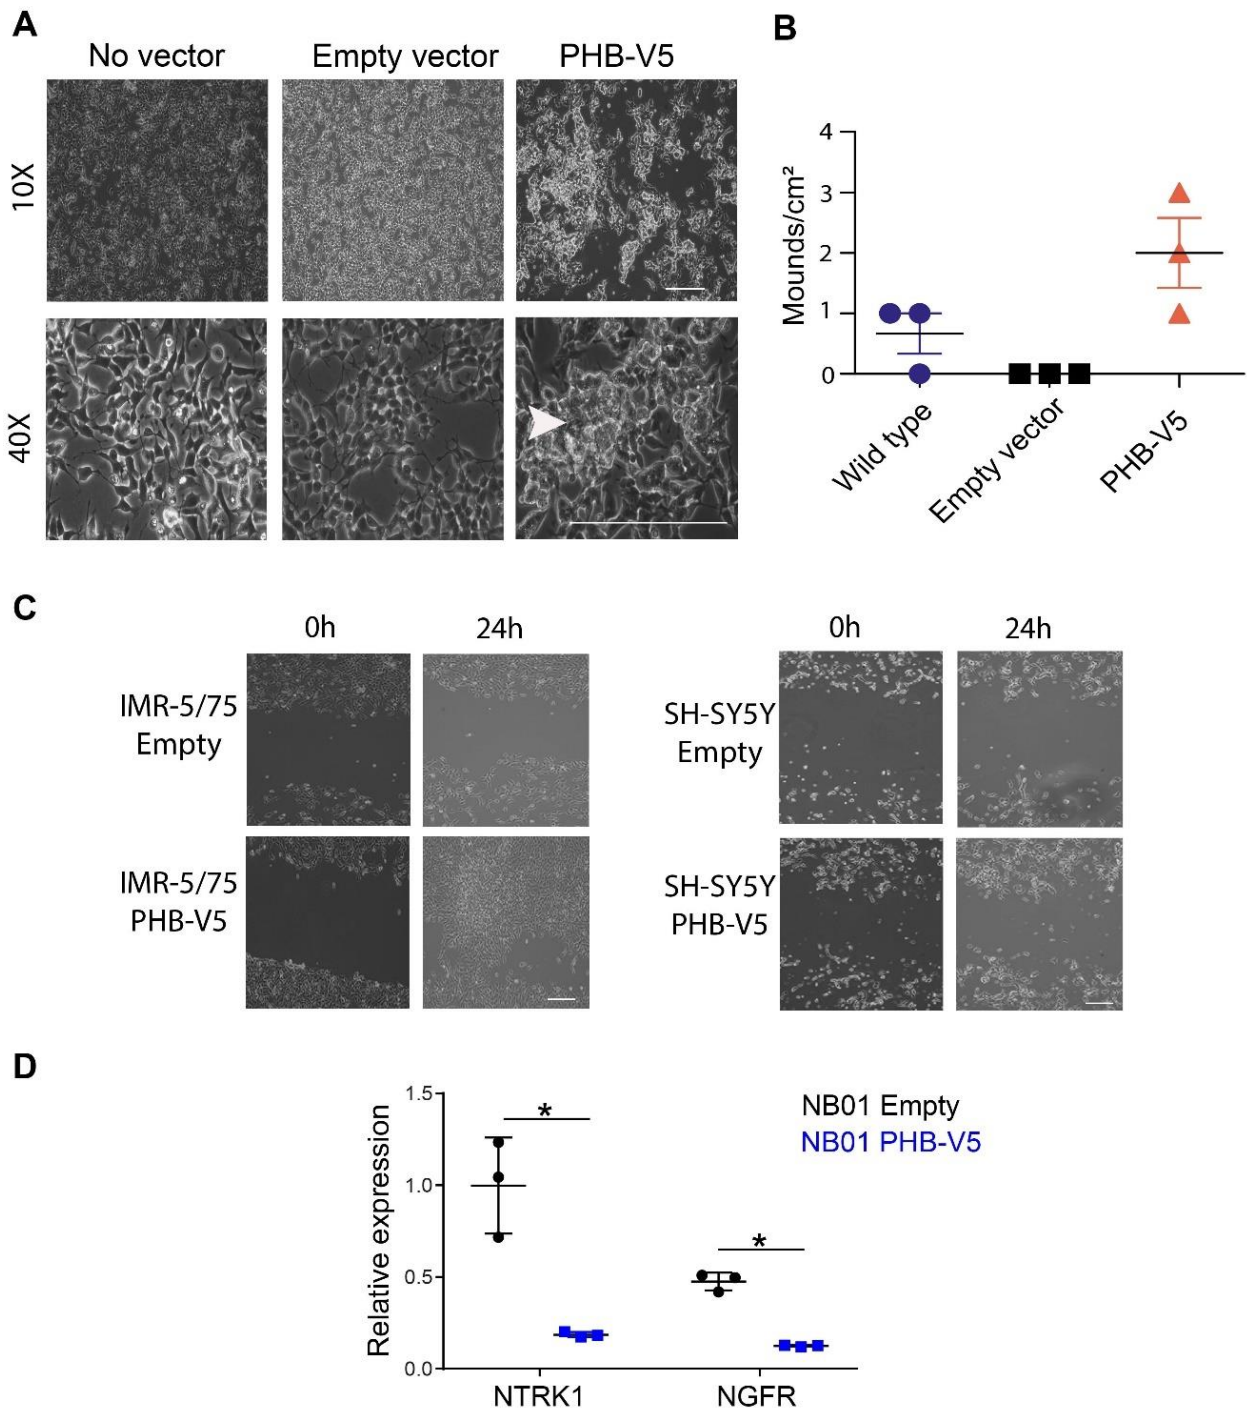

150  
 151 **Supplemental Figure 6. Ectopic expression of *PHB-V5* promotes mound growth and**  
 152 **migration and suppresses the expression of favorable prognostic markers in**  
 153 **neuroblastoma cells. A.** Photomicrographs of SH-SY5Y cells stably expressing *PHB-V5*  
 154 compared to cells expressing an empty vector control. White arrowhead indicates exemplary  
 155 mound. Scale bars indicate 100  $\mu$ m. Photomicrographs are representative of three  
 156 independent samples. **B.** Quantification of mounds formed by NB01 cells stably expressing  
 157 *PHB-V5* compared to cells expressing an empty vector control.  $p > 0.05$ , two-tailed t-test. **C.**  
 158 Representative photomicrographs of the scratch migration assay of IMR-5/75 ( $n = 3$ ) and SH-  
 159 SY5Y ( $n = 1$ ). cells stably expressing *PHB-V5* or empty vector. Scale bars indicate 100  $\mu$ m. **D.**  
 160 mRNA expression of *NTRK1* and *NGFR* measured by qRT-PCR in NB01 cells stably  
 161 expressing *PHB-V5* compared to cells expressing an empty vector control. \*  $p < 0.05$ , two-  
 162 tailed t-test. Data represent mean  $\pm$  SD. Data represents three technical replicates.

163  
164  
165

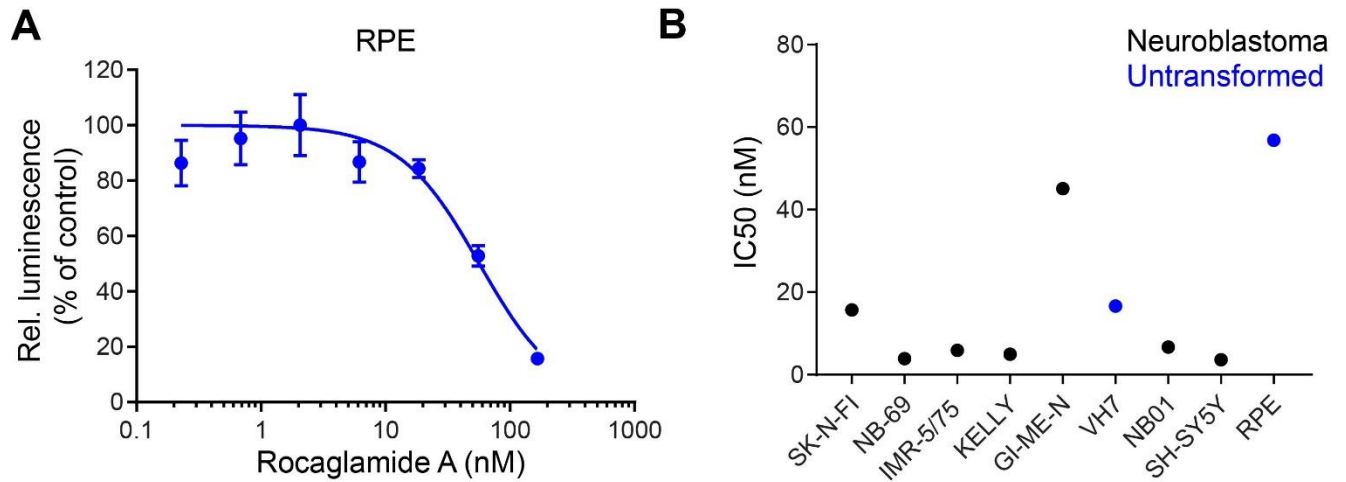

166  
167  
168  
169  
170  
171  
172  
173  
174  
175  
176  
177  
178  
179  
180  
181  
182  
183  
184  
185  
186  
187  
188  
189  
190  
191  
192  
193  
194  
195  
196  
197  
198

**Supplemental Figure 7. Neuroblastoma cell lines exhibit enhanced sensitivity to rocaglamide A treatment.** **A.** Dose response curve of RPE cells treated with RocA as measured with CellTiter-Glo luminescent viability assay 72 hours after treatment. Data represent three technical replicates. **B.** IC50 values of RocA in neuroblastoma cell lines (black) and untransformed RPE and VH7 fibroblast cells (blue).

199

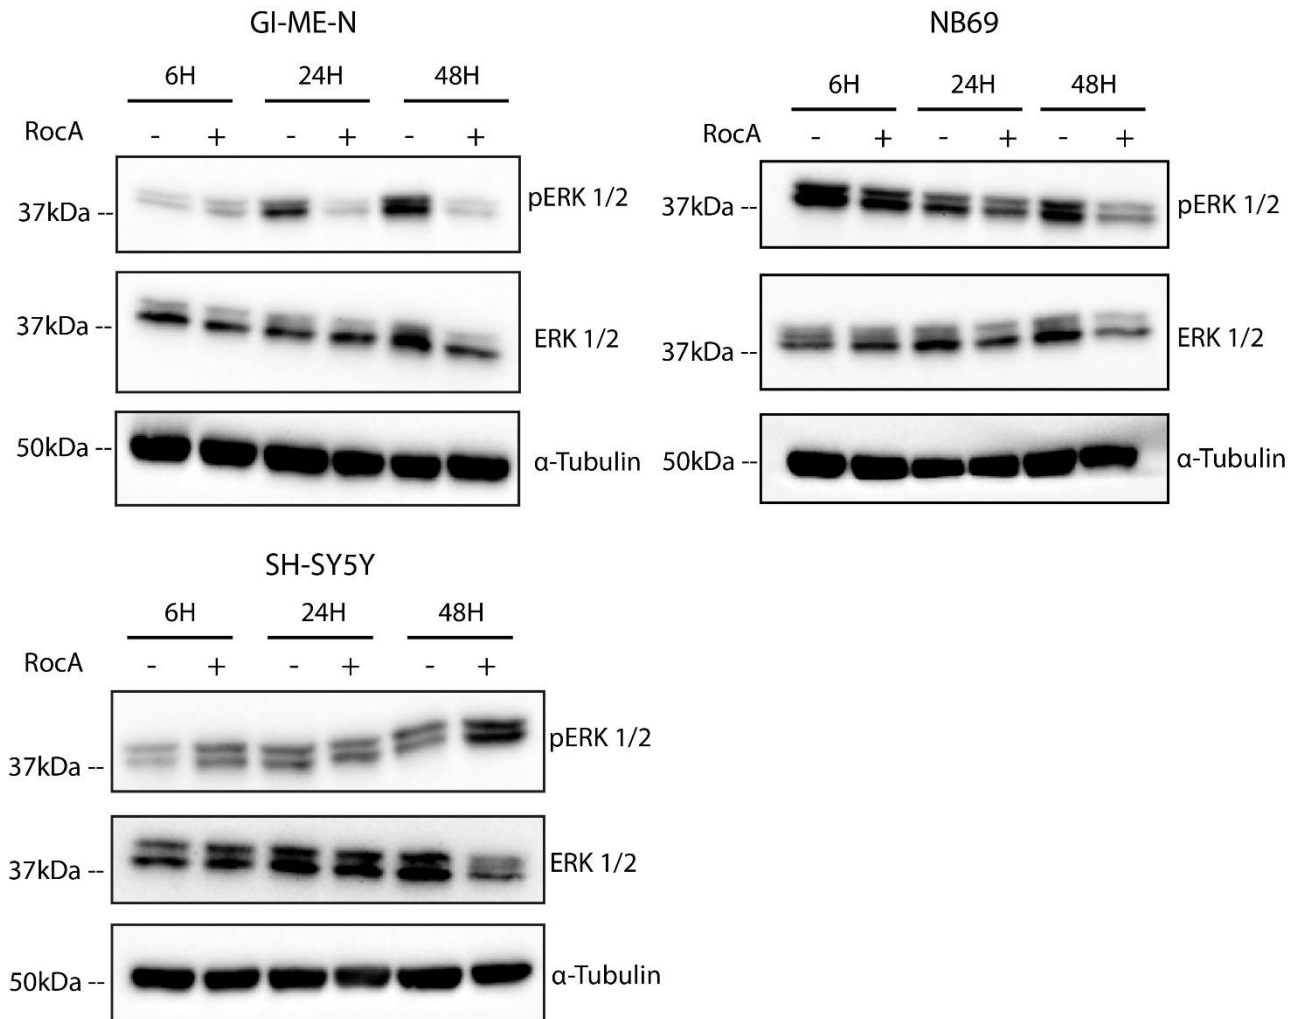

200

201

**Supplemental Figure 8. RocA treatment impairs ERK activation in neuroblastoma cells.**

202

Western blot analysis of GI-ME-N, NB69, and SH-SY5Y cells 6, 24, and 48 hours after treatment with 50 nM RocA compared to DMSO-treated cells. Data represent a single experiment.

203

204

205

206

207

208

209

210

211

212

213

214

215

216

217

218

219

220

221

222  
223

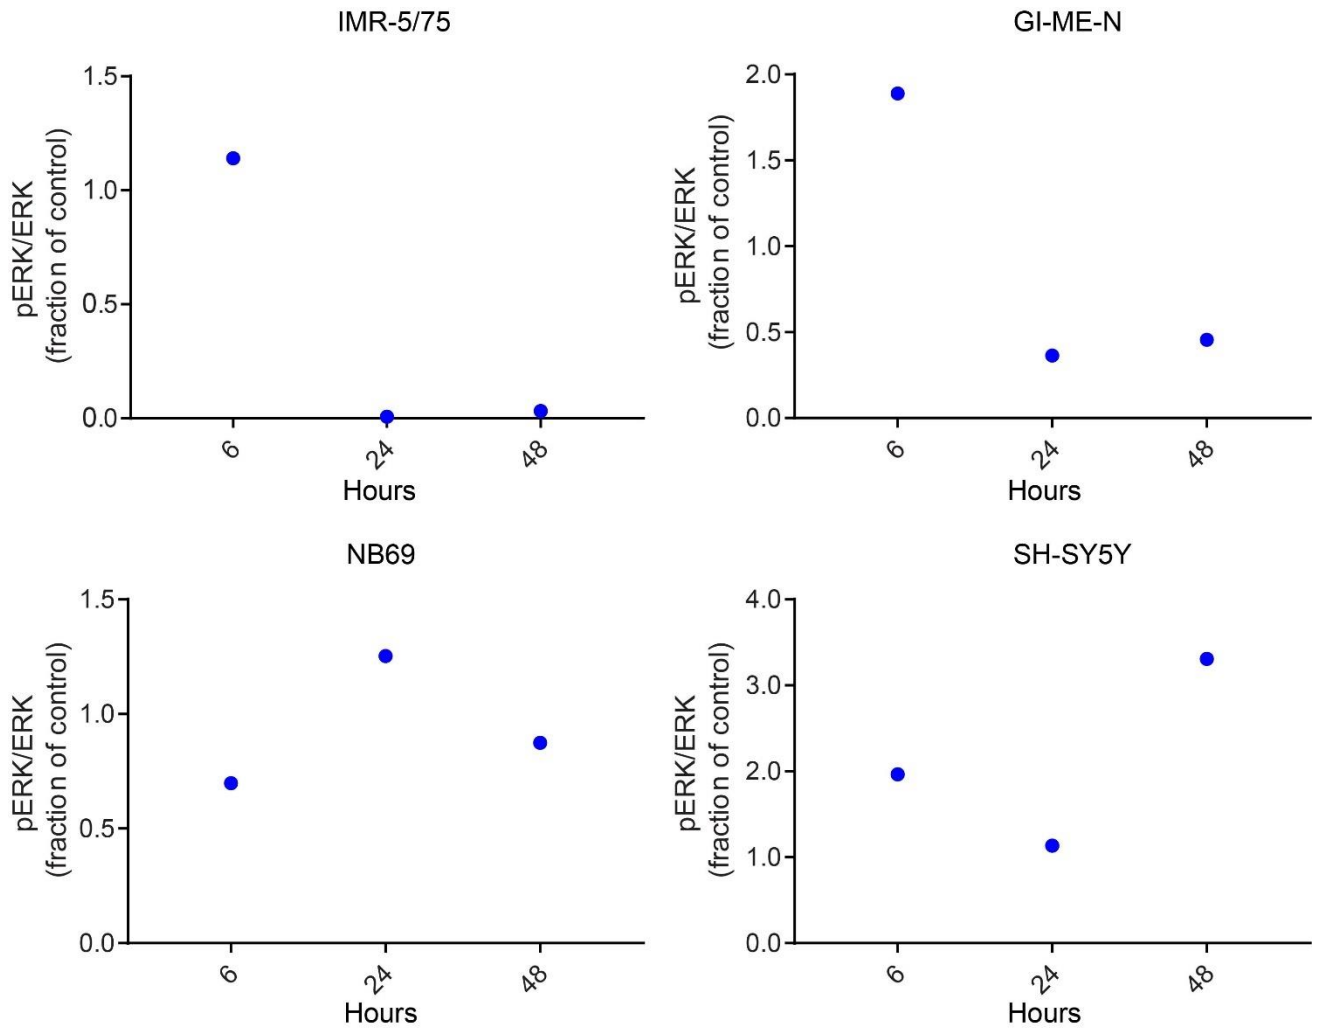

224  
225  
226  
227  
228  
229  
230  
231  
232  
233  
234  
235  
236  
237  
238  
239  
240  
241  
242  
243  
244

**Supplemental Figure 9. RocA treatment impairs ERK activation in neuroblastoma cells.**  
Quantification of western blots displayed in Figure 6B and Supplemental Figure 9 showing ratio of phosphorylated ERK1/2 to total ERK1/2.

245  
246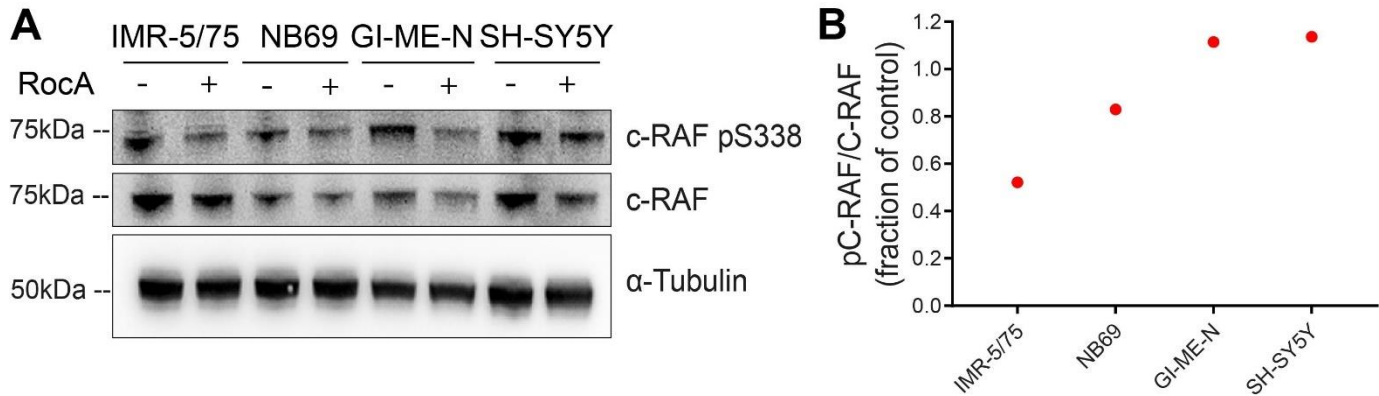

247  
248 **Supplemental Figure 10. RocA treatment does not observably reduce phosphorylation**  
249 **of c-RAF pS338 in neuroblastoma cell lines.** **A.** Western blot analysis of neuroblastoma  
250 cells 24 hours after treatment with 50 nM RocA compared to DMSO-treated cells. Data  
251 represent a single experiment. **B.** Quantification of western blot displayed in panel A showing  
252 ratio of phosphorylated c-RAF to total c-RAF.

253  
254  
255  
256  
257  
258  
259  
260  
261  
262  
263  
264  
265  
266  
267  
268  
269  
270  
271  
272  
273  
274  
275  
276  
277  
278  
279  
280  
281  
282  
283



284

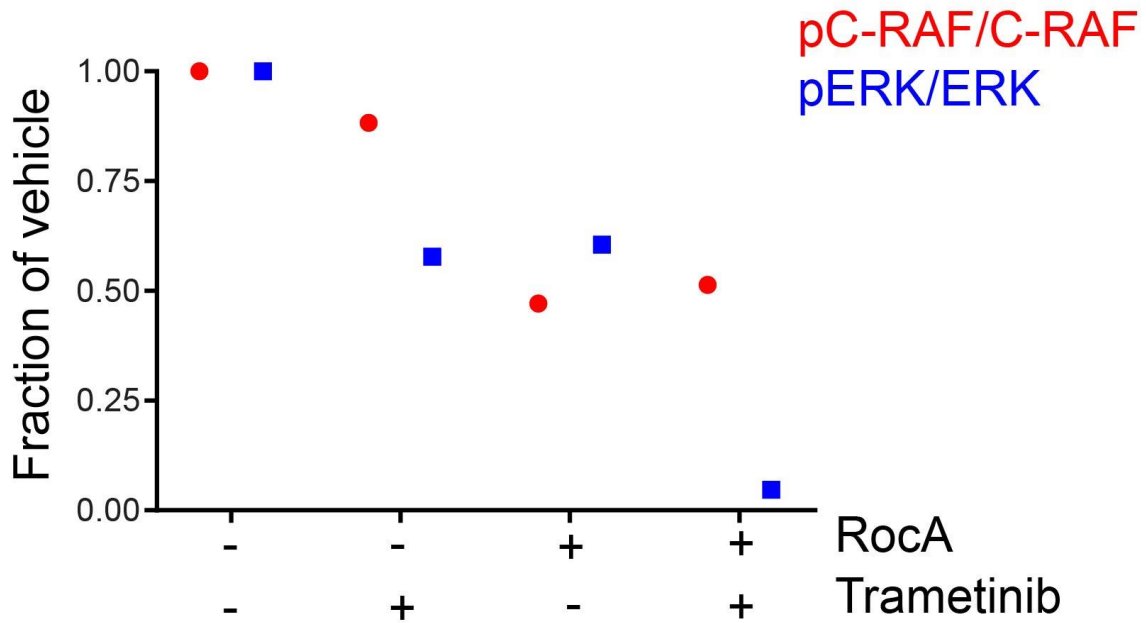

285

286

287

288

289

290

291

292

293

294

295

296

297

298

299

300

301

302

303

304

305

306

307

**Supplemental Figure 11. Rocaglamide A treatment impairs ERK activation in an *ALK*-mutant patient-derived xenograft in vivo.** Quantification of western blot displayed in Figure 7C showing ratios of phosphorylated to total c-RAF and ERK1/2.

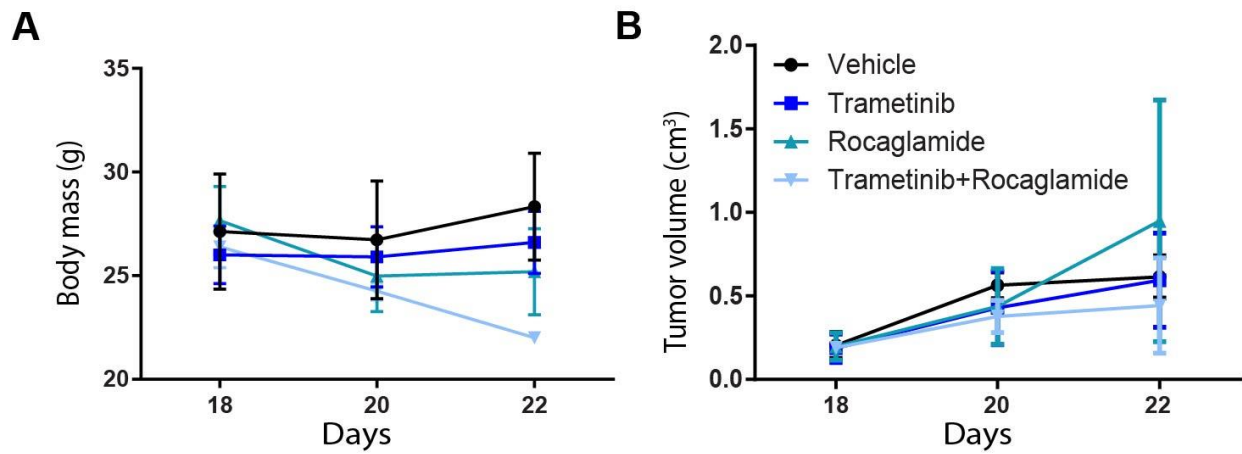

308  
 309 **Supplemental Figure 12. Effect of combination rocaglamide A and trametinib treatment**  
 310 **on mouse body weight and patient-derived xenograft tumor volume. A.** Growth curve of  
 311 mouse body weight over the course of 4 days. n = 3-4. **B.** Tumor volume of an *ALK*-mutant  
 312 patient-derived xenograft over the course of 4 days. n = 3-4. Data represents mean +/- SEM.  
 313 Stated n-values indicate number of biological replicates.

314  
 315  
 316  
 317  
 318  
 319  
 320  
 321  
 322  
 323  
 324  
 325  
 326  
 327  
 328  
 329  
 330  
 331  
 332  
 333  
 334

335 **Supplemental Table 1.** Clinical characteristics of neuroblastoma patient-derived xenograft

|                    |                                          |
|--------------------|------------------------------------------|
| Age                | 2 years                                  |
| INSS <sup>A</sup>  | IV                                       |
| INRG <sup>B</sup>  | High                                     |
| Primary tumor site | Abdomen                                  |
| Biopsy site        | Abdomen                                  |
| Genetics           | <i>MYCN</i> amplified, <i>ALK</i> mutant |

336 <sup>A</sup>International Neuroblastoma Staging System337 <sup>B</sup>International Neuroblastoma Risk Group

338

339

340

341

342

343

344

345

346

347

348

349

350

351

352

353

354

355

356

357

358

359

360

361

362

363

364 **Supplemental Table 2.** Sequences of oligonucleotide primers used for qRT-PCR

| Name         | Description               | Sequence (5'-3')        |
|--------------|---------------------------|-------------------------|
| NTRK1_qPCR_F | qRT-PCR of<br>human NTRK1 | CACTAACAGCACATCTGGAGACC |
| NTRK1_qPCR_R | qRT-PCR of<br>human NTRK1 | TGAGCACAAGGAGCAGCGTAGA  |
| NGFR_qPCR_F  | qRT-PCR of<br>human NGFR  | CCTCATCCCTGTCTATTGCTCC  |
| NGFR_qPCR_R  | qRT-PCR of<br>human NGFR  | GTTGGCTCCTTGCTTGTCTGC   |
| HPRT1_qPCR_F | qRT-PCR of<br>human HPRT1 | TGACACTGGCAAACAATGCA    |
| HPRT1_qPCR_R | qRT-PCR of<br>human HPRT1 | GGTCCTTTTCACCAGCAAGCT   |

365

366

367

368

369

370

371

372

373

374

375

376

377

378

379

380

381

382

383

384

385

386

387

388 **Supplemental Table 3.** Plasmid vectors

| Name           | Clone          | Source                                |
|----------------|----------------|---------------------------------------|
| pLKO.1-shGFP   | TRCN0000559399 | Dharmacon Inc.,<br>Lafayette, CO, USA |
| pLKO.1-shPHB-1 | TRCN0000029204 | Dharmacon Inc.                        |
| pLKO.1-shPHB-2 | TRCN0000029206 | Dharmacon Inc.                        |
| pLKO.1-shPHB-3 | TRCN0000029208 | Dharmacon Inc.                        |
| pLX304-Empty   | N.A.           | David Root                            |
| pLX304-PHB-V5  | N.A.           | Alex Kentsis                          |

389

390

391

392

393

394

395

396

397

398

399

400

401

402

403

404

405

406

407

408

409

410

411

412

413

414

415

416

417 **Supplemental Table 4.** Antibodies

| Name                          | Clone      | Catalogue # | Source                                          |
|-------------------------------|------------|-------------|-------------------------------------------------|
| Mouse anti-Prohibitin         | E-5        | sc-377037   | Santa Cruz Biotechnology, Inc., Dallas, TX, USA |
| Rabbit anti-Prohibitin        | Polyclonal | sc-28259    | Santa Cruz Biotechnology, Inc.                  |
| Mouse anti-Prohibitin pT258   | Polyclonal | GTX55299    | GeneTex, Inc., Irvine, CA, USA                  |
| Mouse anti- $\alpha$ -Tubulin | DM1A       | 3873        | Cell Signaling Technology, Danvers, MA, USA     |
| Rabbit anti-ERK               | 137F5      | 4695        | Cell Signaling Technology                       |
| Rabbit anti-ERK pT202/Y204    | D13.14.4E  | 4370        | Cell Signaling Technology                       |
| Rabbit anti-c-RAF             | Polyclonal | 9422        | Cell Signaling Technology                       |
| Rabbit anti-c-RAF pS338       | 56A6       | 9427        | Cell Signaling Technology                       |
| Rabbit anti-Cox IV            | Polyclonal | 4844        | Cell Signaling Technology                       |
| Mouse anti-V5                 | SV5-PK1    | ab27671     | Abcam, Cambridge, UK                            |
| Mouse anti- $\beta$ -Actin    | 8H10D10    | 3700        | Cell Signaling Technology                       |

418

419

420

421

422

423

424

425

Figure 2

Prohibitin pT258

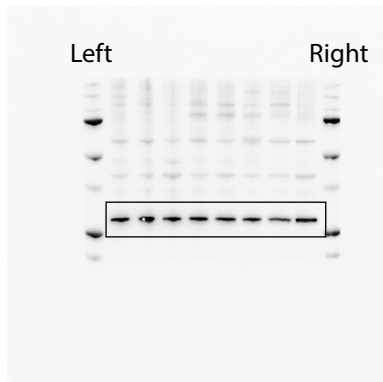

Prohibitin

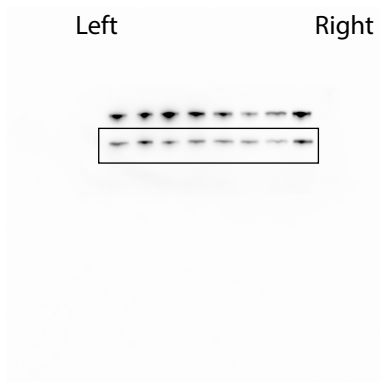

$\alpha$ -Tubulin

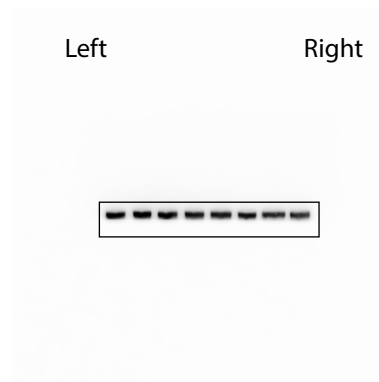

ERK1/2 pT202/Y204

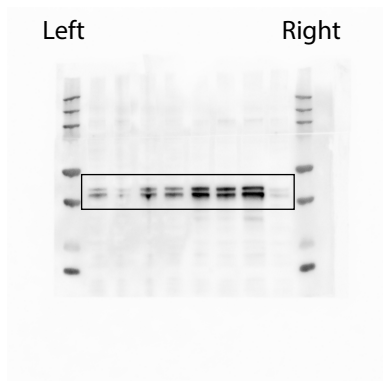

ERK1/2

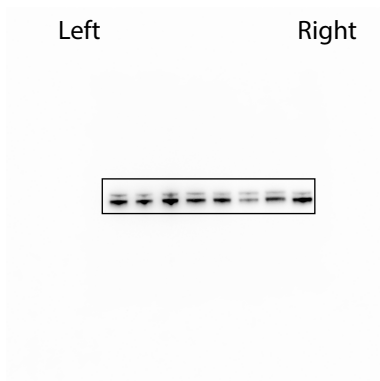



Figure 3

Prohibitin

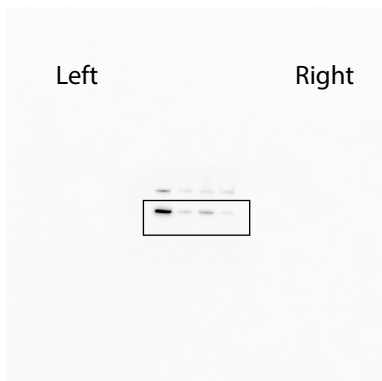

c-RAF pS338

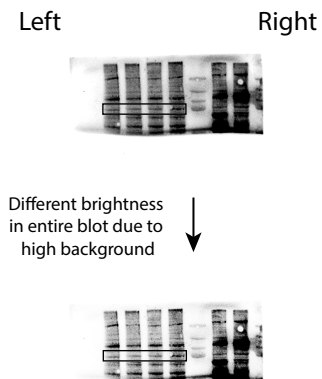

c-RAF

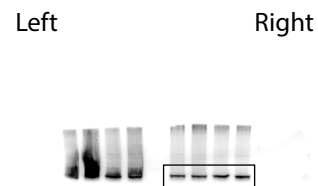

ERK1/2 pT202/Y204

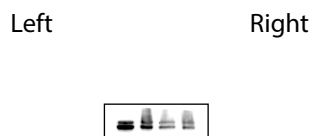

ERK1/2

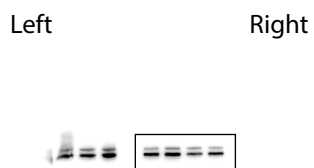

Cleaved caspase 3

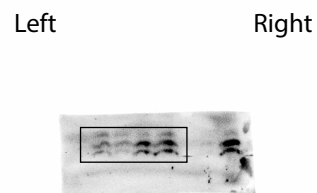

$\alpha$ -Tubulin

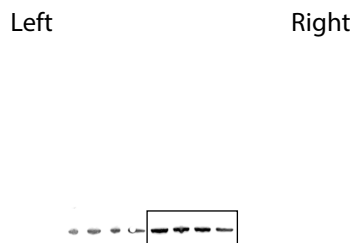

Figure 5

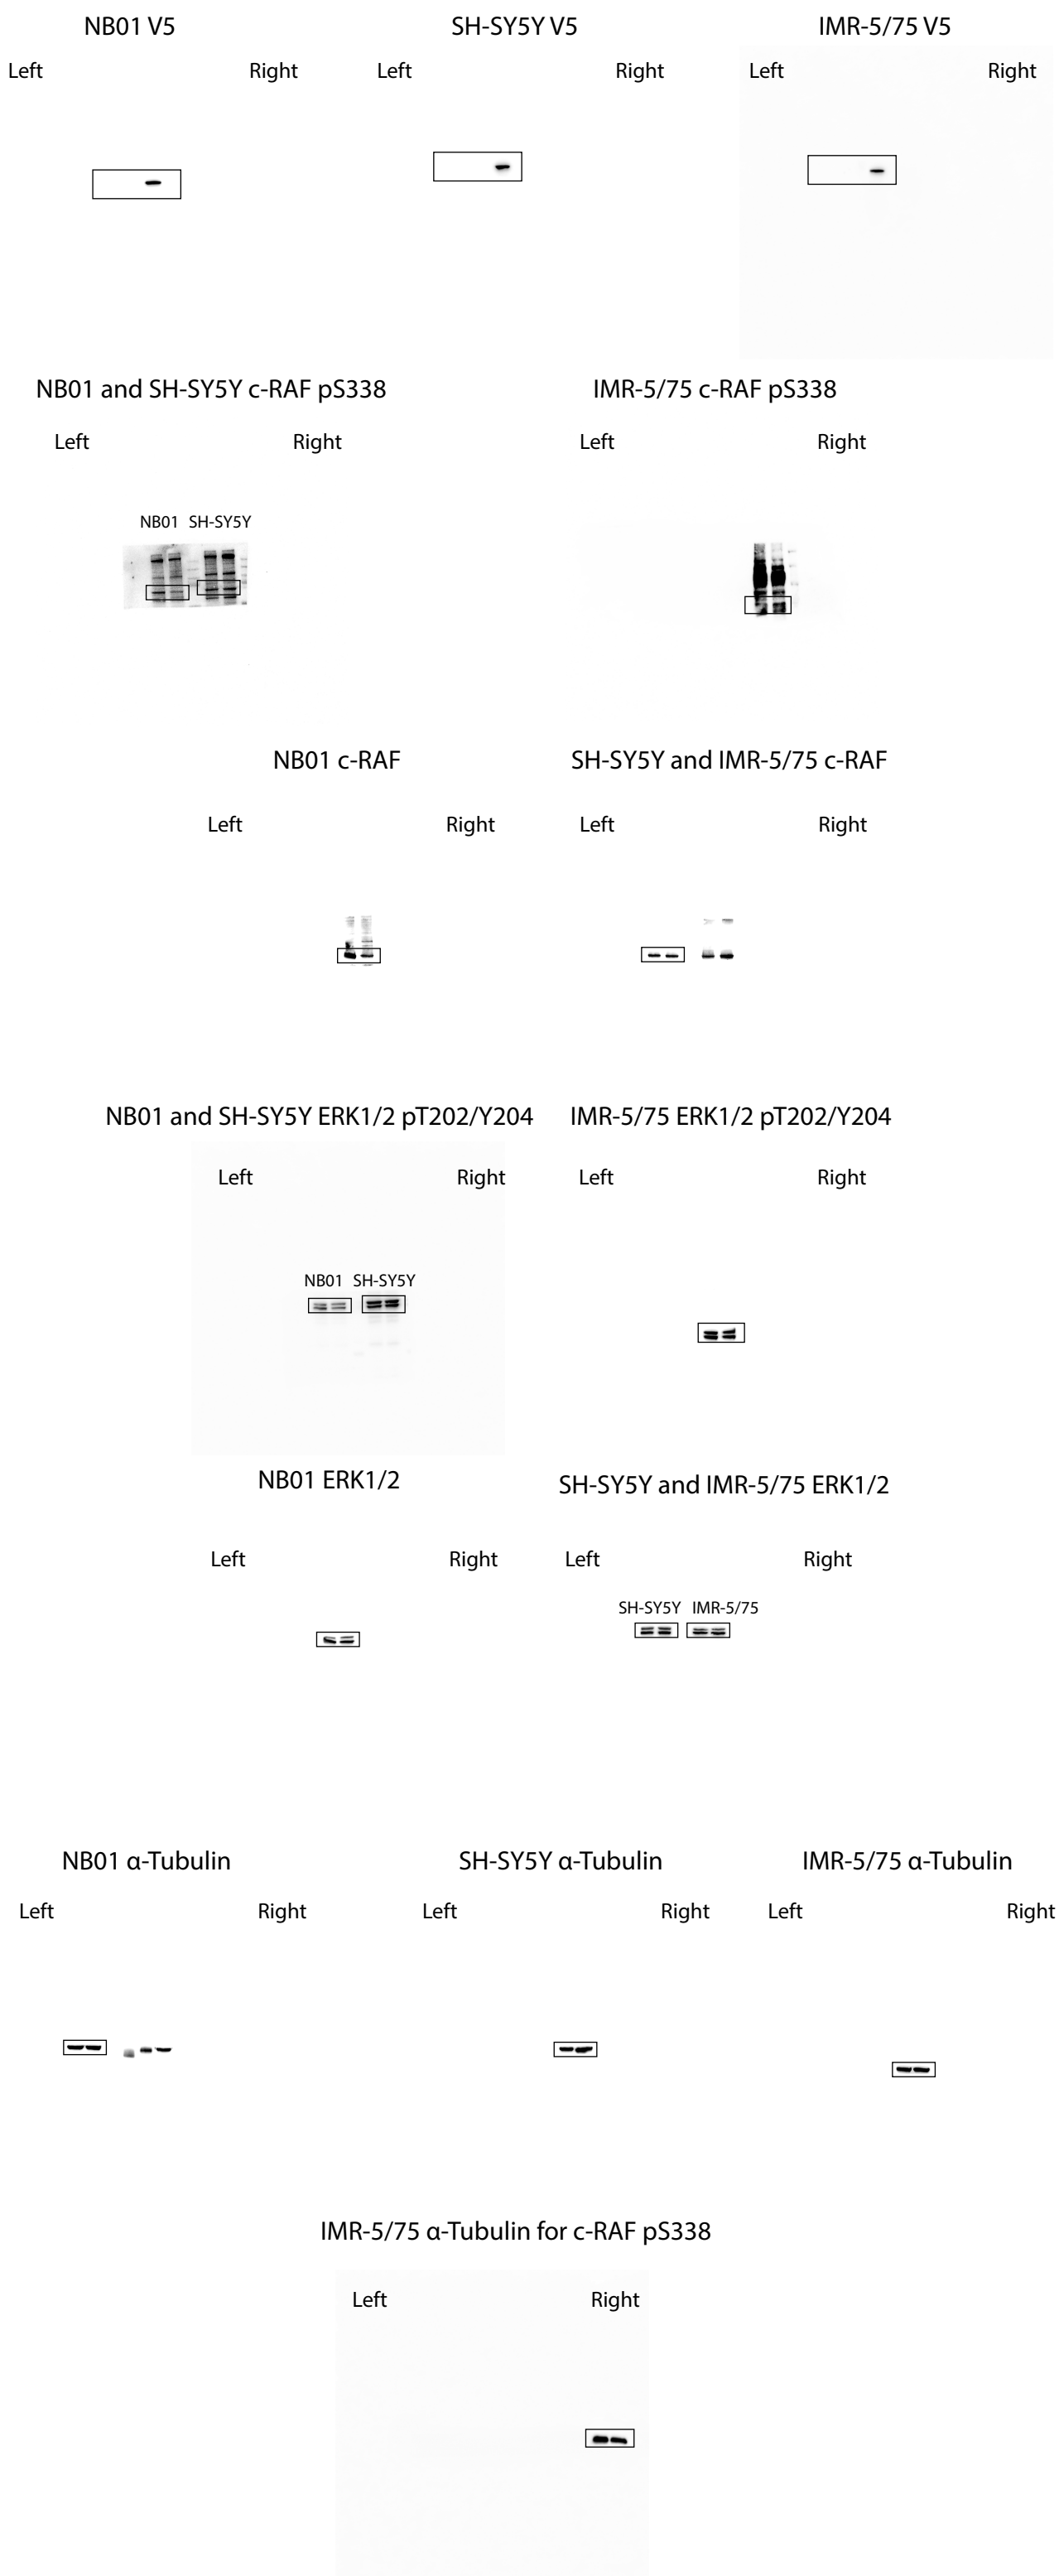

# Figure 6 and Supplemental Figure 9

IMR-5/75 and NB69 ERK1/2 pT202/Y204

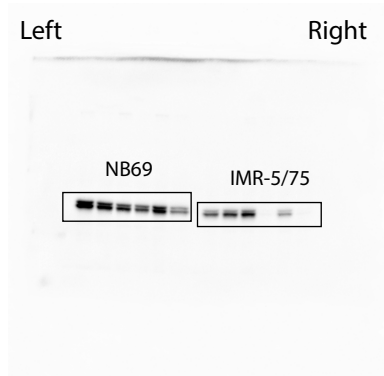

IMR-5/75 and NB69 ERK1/2

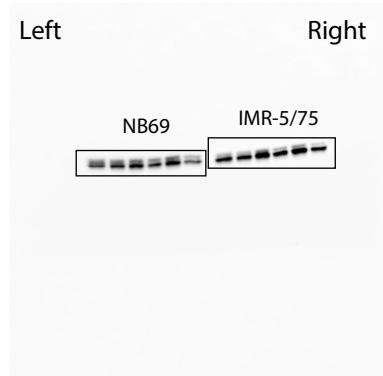

IMR-5/75  $\alpha$ -Tubulin

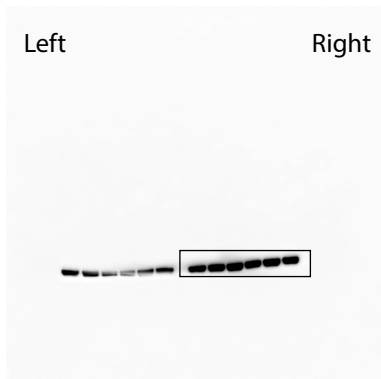

NB69  $\alpha$ -Tubulin

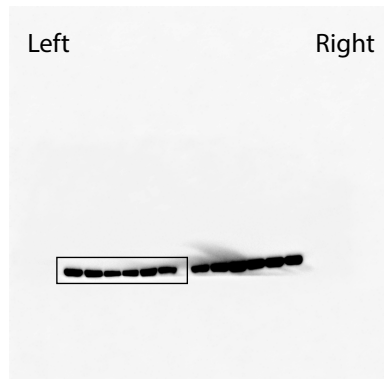

Figure 7

Prohibitin pT258

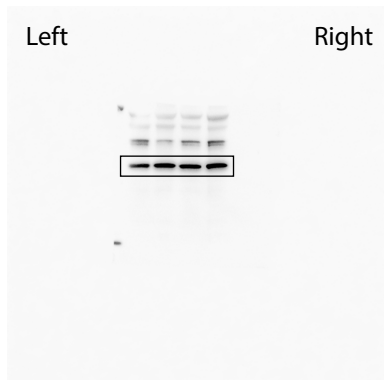

Prohibitin

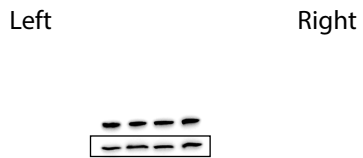

$\alpha$ -Tubulin

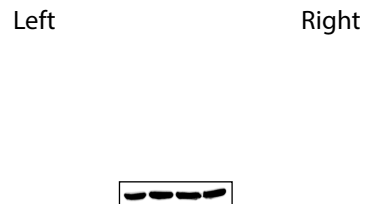

c-RAF pS338

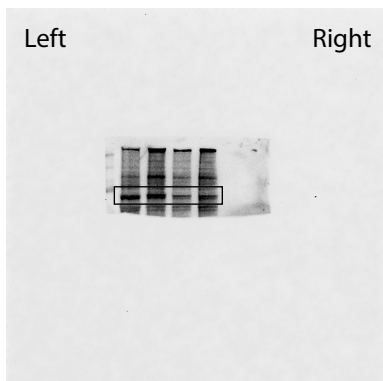

c-RAF

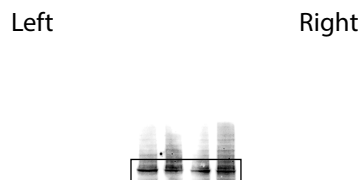

ERK1/2 pT202/Y204

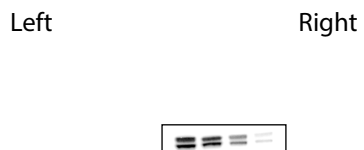

ERK1/2

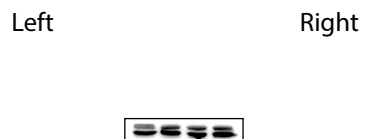

# Supplemental Figure 5

NB01 ERK1/2 pT202/Y204

Left Right

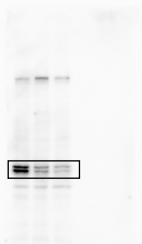

NB01 ERK1/2

Left Right

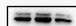

NB01  $\alpha$ -Tubulin

Left Right

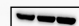

Kelly ERK1/2 pT202/Y204

Left Right

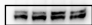

Kelly ERK1/2

Left Right

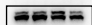

Kelly  $\alpha$ -Tubulin

Left Right

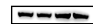

# Supplemental Figure 9

## GI-ME-N and SH-SY5Y ERK1/2 pT202/Y204

## GI-ME-N ERK1/2

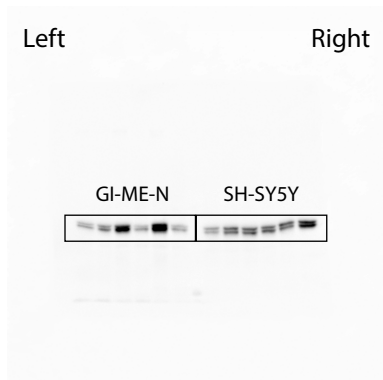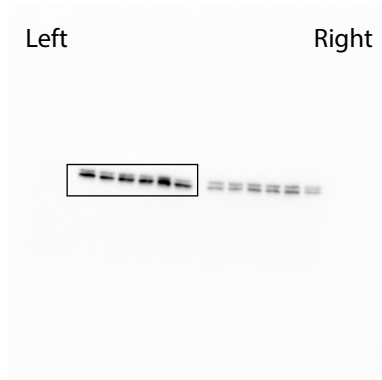

## SH-SY5Y ERK1/2

## GI-ME-N and SH-SY5Y $\alpha$ -Tubulin

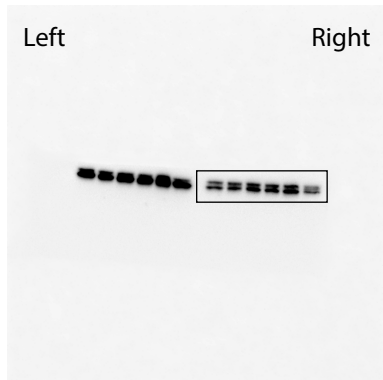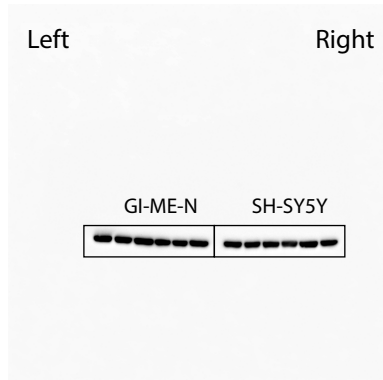

Supplement: jciinsight-4-127130-s073.pdf [file jciinsight-4-127130-s073.pdf]
